# Supplementary material for: Socialization, Indifference, and Convenience: Exploring the Uptake of Influenza Vaccine Among Medical Students and Early Career Doctors
Source: PubMed Central journal article supplement — Qual Health Res. 2017 Jul 24;27(13):1982–93. doi: 10.1177/1049732317720664 (PMC5669255; doi:10.1177/1049732317720664), 2017-07-24
Supplement: Supplement_2.pdf [file Supplement_2.pdf]

## Semi-Structured Interview Questions

Begin with a verbal introduction and confirm that they understand what they are consenting too and that they are happy to continue. Remind them that they will be recorded.

| <b>Topic</b>                                 | <b>Lead Question</b>                                                            | <b>Follow up Questions</b>                                                                                                                                                                                                                                                                                                                                                                                                            |
|----------------------------------------------|---------------------------------------------------------------------------------|---------------------------------------------------------------------------------------------------------------------------------------------------------------------------------------------------------------------------------------------------------------------------------------------------------------------------------------------------------------------------------------------------------------------------------------|
| <b>Influenza Vaccination attitude</b>        | What do you think about the seasonal influenza vaccine?                         | What influences your attitude towards the flu vaccine (prompts: media, research, co-workers)? / Why do you choose to vaccinate/not vaccinate? / Has your opinion of influenza vaccination ever changed? / What do you think encourages & discourages you and your colleagues to take the seasonal influenza vaccine? / how do you think about your risk of infection? / What did you think about when made your vaccination decision? |
| <b>Peer influence</b>                        | What's your relationship like with the people you work with?                    | Do you see them regularly? / Do you do things together outside of work? / Do you think they influence your behaviour at work? / In what way? Do you and your colleagues talk about the seasonal influenza vaccine? / Do you think your colleagues influence your opinion of vaccination?                                                                                                                                              |
| <b>Role models</b>                           | Who do you look up to professionally?                                           | Do you see them often? / do you imitate their work behaviours? / Do you think they have a flu vaccine regularly? / How does that affect your attitude towards the vaccine?                                                                                                                                                                                                                                                            |
| <b>Homophily</b>                             | Do you think you socialise with people at work because they are similar to you? | In what way? / In what setting? / are you aware of your friends attitudes towards the seasonal influenza vaccine?                                                                                                                                                                                                                                                                                                                     |
| <b>Social network effects on vaccination</b> | Would you say you are a social member of the group at work?                     | Do you think you influence your peers' behaviour at work? / Do you ever think about how your social interactions at work could affect infectious spread within the hospital?                                                                                                                                                                                                                                                          |
